# Supplementary material for: CRISPR/Cas9 Mediated Knockout of the OsbHLH024 Transcription Factor Improves Salt Stress Resistance in Rice (Oryza sativa L.)
Source: MDPI journal article supplement (doi:10.3390/plants11091184), 2022-04-27
Supplement: s1 [file s1]

**Table S1.** Primers used in this study

| Primers                                               | Sequence (5'-3')                                    |
|-------------------------------------------------------|-----------------------------------------------------|
| <b>Recombinant pYLCRISPR/Cas9 vector construction</b> |                                                     |
| U-F                                                   | CTCCGTTTTACCTGTGGAATCG                              |
| gR-R                                                  | CGGAGGAAAATTCCATCCAC                                |
| Pps-GGL                                               | TTCAGAGG <u>GCTCT</u> CTCGACTAGTATGGAATCGGCAGCAAAGG |
| Pgs-GG2                                               | AGCGTG <u>GCTCT</u> CGTCAGGGTCCATCCACTCCAAGCTC      |
| Pps-GG2                                               | TTCAGAGG <u>GCTCT</u> CTGACACTGGAATCGGCAGCAAAGG     |
| Pgs-GGR                                               | AGCGTG <u>GCTCT</u> CGACCGACGCGTATCCATCCACTCCAAGCTC |
| Target-1OsHLH024                                      | ATTCCACTCACTCAACCGAA                                |
| Target-2 OsHLH024                                     | GATGTCGGAGAGGAAGAGGA                                |
| <b>Mutation detection</b>                             |                                                     |
| OsHLH024T1F1                                          | CGTGCCGATGGATCAGAAG                                 |
| OsHLH024T1R1                                          | GGGATTGATTCCTCTTAATCAGC                             |
| <b>Transgenic plant identification</b>                |                                                     |
| XUCas9-F1                                             | TGCTCACCCCTGTTGTTTGGT                               |
| XUCas9-R1                                             | TCATGTGAGCGAGAGCAAGG                                |
| SPL                                                   | GCGGTGTCATCTATGTTACTAG                              |
| SPR                                                   | CCGACATAGATGCAATAACTTC                              |
| <b>qRT-PCR</b>                                        |                                                     |
| <i>OsHKT1;1 F</i>                                     | ATTAGCAGAGCACTGTGGAGGAA                             |
| <i>OsHKT1;1 R</i>                                     | CCGACGAACCCGTAGGAAG                                 |
| <i>OsHKT1;3 F</i>                                     | CAGTTCATCTACCAAAACAATCCA                            |
| <i>OsHKT1;3 R</i>                                     | AATACCTCACCACCAATCAGCA                              |
| <i>OsHKT1; 5 F</i>                                    | TGCCACCTTACACCACTTTTCG                              |
| <i>OsHKT1; 5 R</i>                                    | TGCCATACGCACTGATAACCTC                              |
| <i>OsHAK7 F</i>                                       | TGCTGTGACACTTGGTTTCC                                |
| <i>OsHAK7 R</i>                                       | AAATAACAAGGCGAGCAGGA                                |
| <i>OsSOS1F1</i>                                       | GACACTGGGAATGTTCTATGC                               |
| <i>OsSOS1R1</i>                                       | CCATGAAGCACCGTGCCTCTCG                              |

|                         |                          |
|-------------------------|--------------------------|
| <i>OsLEA3 F1</i>        | AATGATTTCCTTTGGGTC       |
| <i>OsLEA3 R1</i>        | CATCAGTACACATCACCCA      |
| <i>OsACTIN1 F (35s)</i> | CTCAGCACATTCCAGCAGATGTG  |
| <i>OsACTIN1 R (35s)</i> | GATAACAGCTCCTCTTGGCTTAGC |

**Table S2.** The agronomic traits of A91 and the WT in the field

| Traits                         | WT           | A91 Mutant     |
|--------------------------------|--------------|----------------|
| Plant height (cm)              | 76.21 ± 0.69 | 81.02 ± 0.53** |
| Panicle length (cm)            | 21.67±0.35   | 21.61 ±0.27    |
| Primary branches per panicle   | 8.57 ±0.29   | 8.87± 0.16     |
| Secondary branches per panicle | 21.63±0.49   | 22.4±0.63      |
| Flag leaf length (cm)          | 32.49±0.80   | 33.25±0.68     |
| Panicles per plant             | 8.67±0.45    | 8.27±0.49      |
| Grains per panicle             | 89.83±2.39   | 93.33±2.13     |
| Seed setting rate (%)          | 78.06±2.1    | 78.89±1.3      |
| 1000- grain weight (g)         | 24.42±0.29   | 24.47±0.37     |
| Grain length (mm)              | 7.28±0.07    | 7..37±0.05     |
| Grain width (mm)               | 3.25±0.02    | 3.27±0.02      |
| Grain thickness (mm)           | 2.14±0.01    | 2.17±0.01      |
| Tiller biomass (g)             | 7.63±0.40    | 8.76±0.26*     |

Values are expressed as means ± SE; n=10 biological replicates; \* and \*\* denote significant *t*-test results at  $P < 0.05$  and  $P < 0.01$ , respectively.

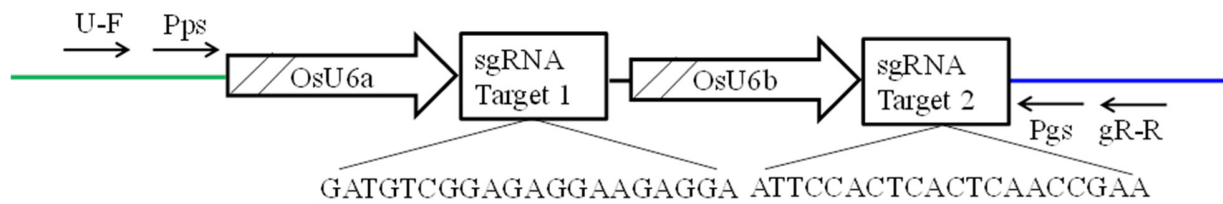

**Figure S1.** A linear form of the sgRNA vectors. The target-1 and target-2 were driven by OsU6a and OsU6b promoters, respectively by PCRs using primers U-F/gR-R and Pps/Pgs.

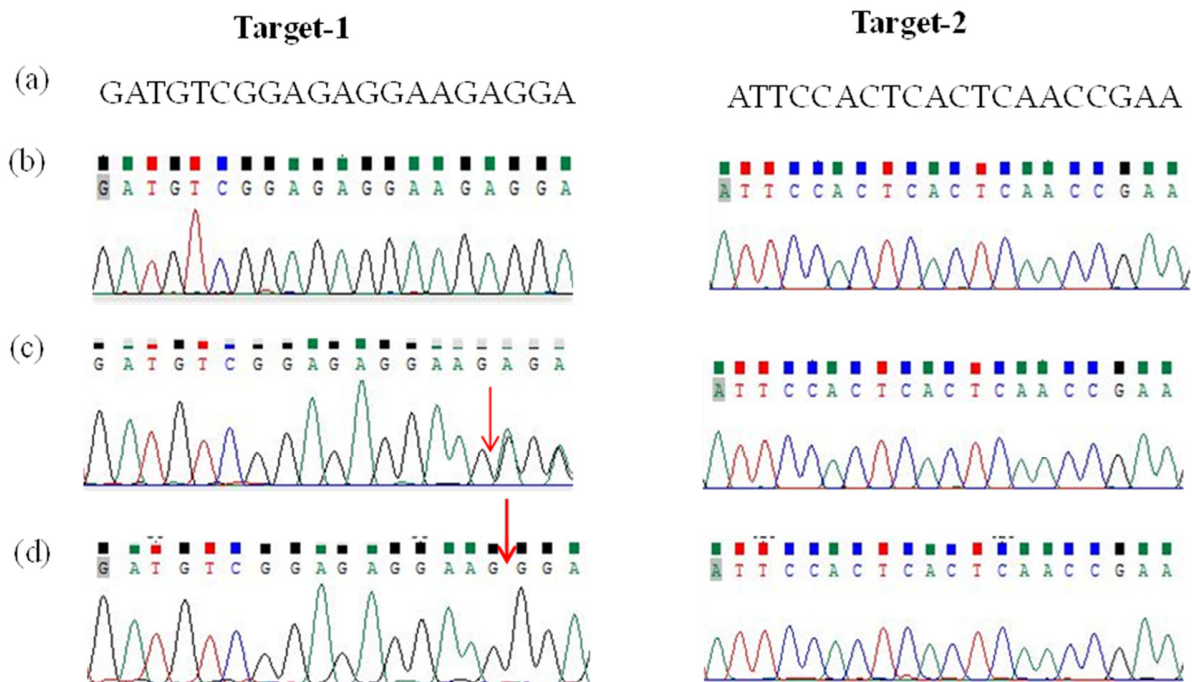

**Figure S2.** Mutation process showing chromatograph of *osbHLH024*. (a) Wild-type sequence of two targets; (b) two targets in EHA105 strain of *Agrobacterium tumefaciens*; (c) heterozygous mutation in T0 generation, the red arrow indicates heterozygous starting position; (d) sequence of homozygous T1 mutant (A91), the red arrow indicates deletion of "A."

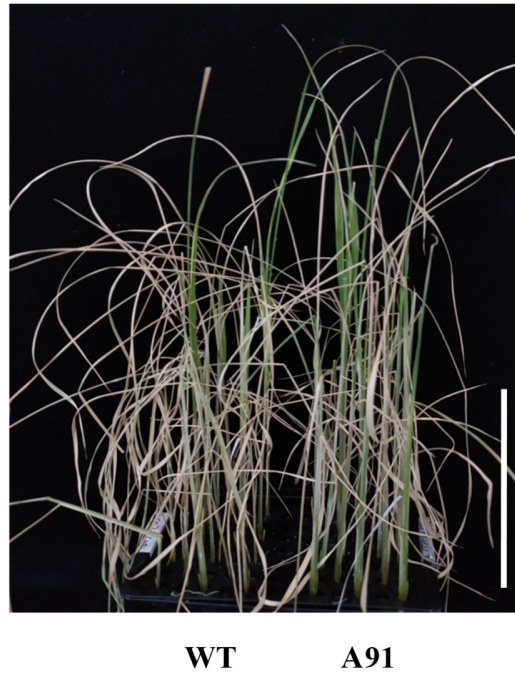

**Figure S3.** The growth characteristics of the A91 and WT after 7 days of 150 mM NaCl stress of 21-day-old seedlings. Scale bar 10 cm.

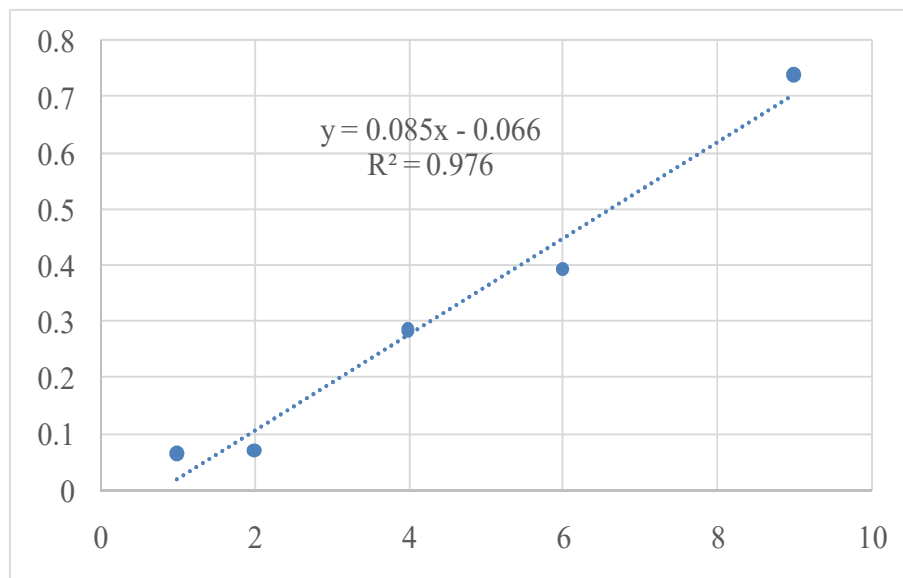

**Figure S4.** Standard curve for H<sub>2</sub>O<sub>2</sub> determination.
